# Supplementary material
Source: PubMed Central journal article supplement (PMC3873108)

## **WEB MATERIAL**

*American Journal of Epidemiology* (DOI: kwt241)

### **Association Between Unprotected Ultraviolet Radiation Exposure and Recurrence of Ocular Herpes Simplex Virus**

Christina Ludema\*, Stephen R. Cole, Charles Poole, Jennifer S. Smith, Victor J. Schoenbach,  
and Kirk Wilhelmus

\*Correspondence to Dr. Christina Ludema, Department of Epidemiology, Gillings School of  
Global Public Health, University of North Carolina at Chapel Hill, Campus Box 7435, Chapel  
Hill, NC 27599-7435 (e-mail: ludema@email.unc.edu).

**Web Table 1.** Time spent outdoors each week, by UV index category.

| <b>Sun Exposure,<br/>hours/week</b> | <b>UV Index &lt;4</b> | <b>UV Index ≥4</b> |
|-------------------------------------|-----------------------|--------------------|
| ≤7                                  | 3,633                 | 3,536              |
| 8-14                                | 584                   | 1,158              |
| 15-21                               | 173                   | 495                |
| 22-28                               | 81                    | 184                |
| ≥19                                 | 105                   | 214                |

Abbreviation: UV, ultraviolet.

**Web Table 2.** Description of weights over time.

|           | <b>Mean</b> | <b>SD</b> | <b>Min</b> | <b>Max</b> | <b>1st Pctl</b> | <b>25th Pctl</b> | <b>50th Pctl</b> | <b>75th Pctl</b> | <b>99th Pctl</b> |
|-----------|-------------|-----------|------------|------------|-----------------|------------------|------------------|------------------|------------------|
| Untrimmed |             |           |            |            |                 |                  |                  |                  |                  |
| Exposure  | 1.18        | 3.833     | 0.005      | 184.151    | 0.199           | 0.714            | 0.941            | 1.099            | 3.468            |
| Censoring | 0.998       | 0.175     | 0.503      | 2.584      | 0.678           | 0.889            | 0.989            | 1.074            | 1.549            |
| Combined  | 1.106       | 2.332     | 0.006      | 104.769    | 0.186           | 0.680            | 0.922            | 1.118            | 3.418            |
| Trimmed   |             |           |            |            |                 |                  |                  |                  |                  |
| Combined  | 1.007       | 0.671     | 0.089      | 13.483     | 0.186           | 0.680            | 0.922            | 1.118            | 3.418            |

Abbreviations: Max, maximum; Min, minimum; Pctl, percentile; SD, standard deviation.

**Web Table 3.** Hazard ratios obtained using full weights and trimmed<sup>a</sup> weights.

| <b>UV Index</b> | <b>Full</b> | <b>Trimmed</b> |
|-----------------|-------------|----------------|
| <4              | 0.64        | 0.84           |
| ≥4              | 2.80        | 3.10           |

Abbreviation: UV, ultraviolet.

<sup>a</sup> Inverse probability of exposure weights trimmed at 0.1 and 10.

**Web Figure 1.** Number of participants in the Herpetic Eye Disease Study over time. Dots represent recurrences of ocular herpes simplex virus (HSV) infection. Participants were censored from the study population at the time of ocular HSV recurrence or after 3 weeks of missing weekly reports.

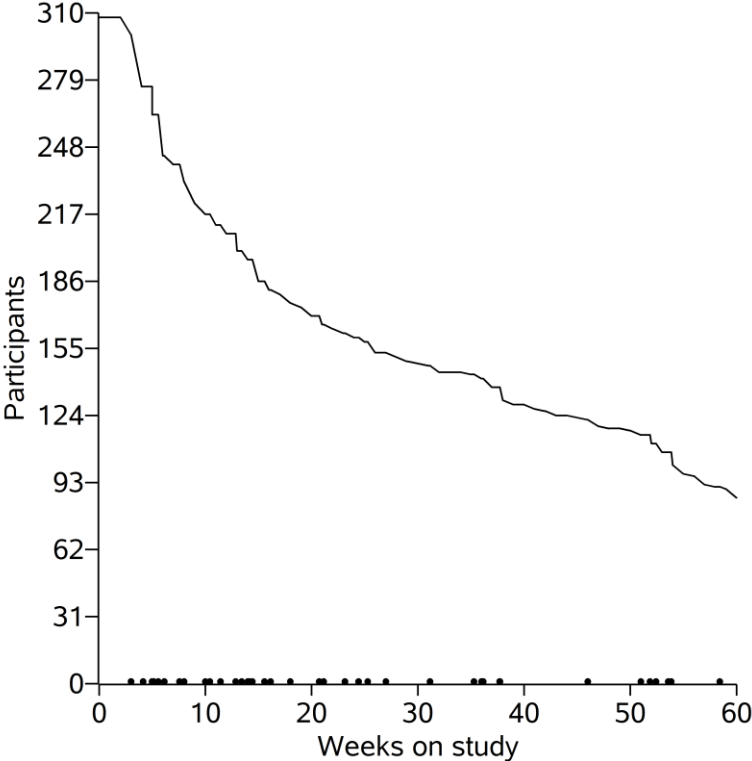

**Web Figure 2.** Crude Kaplan-Meier estimates of the cumulative risk of ocular herpes simplex virus recurrence for person weeks with ultraviolet index values of  $<4$  (panel A) and  $\geq 4$  (panel B) for high sunlight exposure (dashed) and low sunlight exposure (solid), pooled over 30 imputations, in 308 Herpetic Eye Disease Study participants.

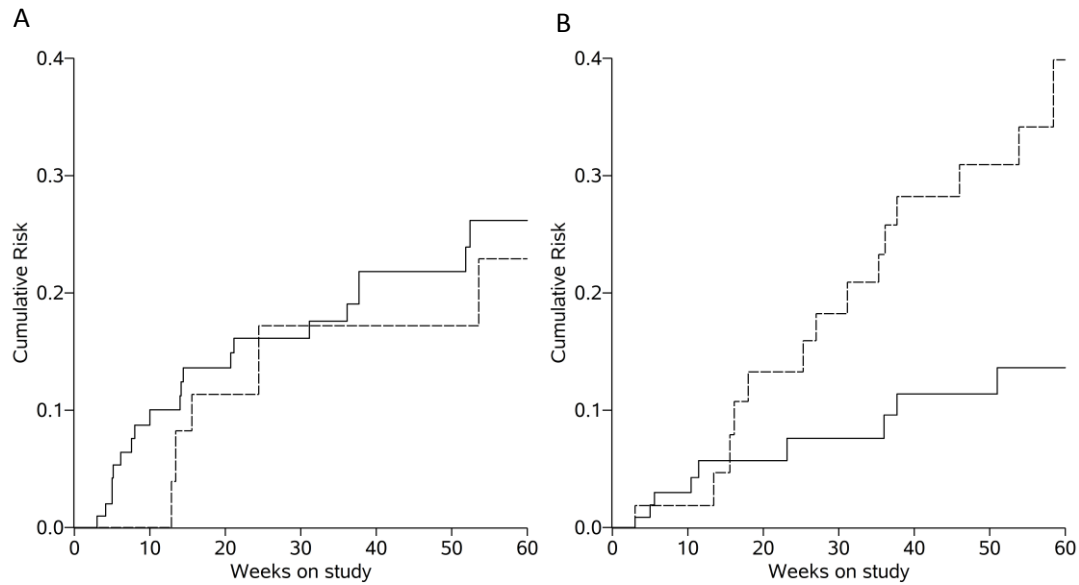

Supplement: supp_kwt241_kwt241supp.pdf [file supp_kwt241_kwt241supp.pdf]
